## Review Article

# Non-coding RNA in cancer

Huiwen Yan<sup>1</sup> and  Pengcheng Bu<sup>1,2,3</sup>

<sup>1</sup>Key Laboratory of RNA Biology, Key Laboratory of Protein and Peptide Pharmaceutical, Institute of Biophysics, Chinese Academy of Sciences, Beijing 100101, China; <sup>2</sup>College of Life Sciences, University of Chinese Academy of Sciences, Beijing 100049, China; <sup>3</sup>Center for Excellence in Biomacromolecules, Chinese Academy of Sciences, Beijing 100101, China

**Correspondence:** Pengcheng Bu (bupc@ibp.ac.cn)

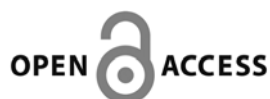

Majority of the human genome is transcribed to RNAs that do not encode proteins. These non-coding RNAs (ncRNAs) play crucial roles in regulating the initiation and progression of various cancers. Given the importance of the ncRNAs, the roles of ncRNAs in cancers have been reviewed elsewhere. Thus, in this review, we mainly focus on the recent studies of the function, regulatory mechanism and therapeutic potential of the ncRNAs including microRNA (miRNA), long ncRNA (lncRNA), circular RNA (circRNA) and PIWI interacting RNA (piRNA), in different type of cancers.

## Introduction

Approx. 75% of the human genome is transcribed into RNA, while only 3% is transcribed into protein-coding mRNAs [1]. According to the length, shape and location, non-coding RNAs (ncRNAs) have been divided into different classes. Among them, microRNA (miRNA), long ncRNA (lncRNA), circular RNA (circRNA) and PIWI interacting RNA (piRNA) are the four major ncRNA types with distinct functions in cancers. miRNAs are a kind of small RNA with approx. 22 nucleotides (nt) in length. miRNAs bind to the complementary sequence in targeted mRNA and cause RNA-induced silencing complex (RISC) to degrade targeted mRNA (Figure 1) [2]. piRNA was first identified in *Drosophila* with 24–30 nt in length. It mainly exists in germline cells and binds to PIWI family proteins to participate in epigenetic regulation of chromatin [3]. LncRNAs and circRNAs are more than 200 nt long, but lncRNAs are linear, while circRNAs are ringlike. Both lncRNAs and circRNAs can be transcribed from exon, intron, intergenic region or 5'/3'-untranslational regions and fold into complicated second structures, which facilitate their interactions with DNA, RNA and proteins (Figures 2 and 3) [4]. LncRNAs and circRNAs regulate gene expression through multiple mechanisms. They can play as miRNA decoy to prevent the targeted mRNA degradation. They can modulate transcription factors to bind to promoters and thus regulate targeted gene expression [5]. They can also work as scaffold to regulate protein–protein interactions and the related downstream signaling pathways. Recently, some studies showed that lncRNAs and circRNAs participated in epigenetic modulation of chromatin to regulate gene expression.

Abundant evidences have shown that ncRNAs play crucial roles in human malignancies. They can work as oncogenes or suppressors to regulate cancer initiation and progression. Many ncRNAs can be released from cancer cells into blood or urine and act as diagnostic markers or prognostic indicators. Here, we mainly focus on overviewing the recently emerging studies of the four major ncRNAs in cancer.

## miRNAs in cancers

Numerous studies have shown the important role of miRNAs in various cancers. Many miRNAs are highly expressed in cancer cells and promote cancer development. Some miRNAs even regulate the progression of multiple cancers. miR-126 is known to be highly expressed in breast [6] and colorectal cancers [7]. Recently, Silva et al. showed that miR-126 was also highly expressed in human B-ALL [8]. Forced expression of miR-126 in mouse hematopoietic stem progenitor cells resulted in B-cell leukemia. Further study revealed that overexpression of miR-126 down-regulated the expression of p53 and its associated genes [9],

Received: 14 August 2020  
 Revised: 04 January 2021  
 Accepted: 16 March 2021

Version of Record published:  
 27 October 2021

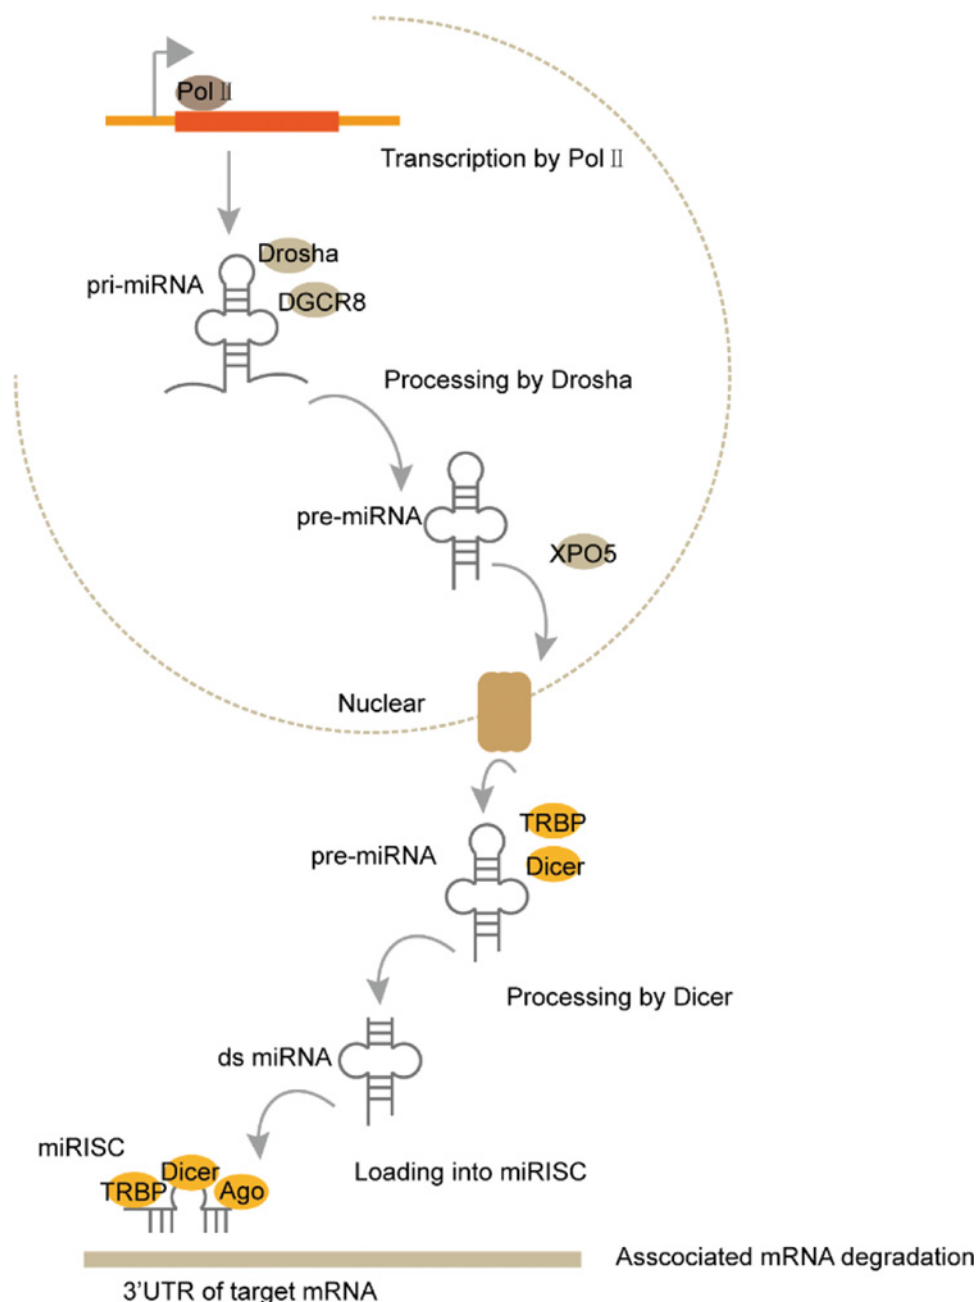

**Figure 1. The biogenesis and effector machineries of miRNAs**

miRNAs are transcribed as pri-miRNAs by RNA polymerase II. Following processing by the Drosha complex, pre-miRNAs are exported to the cytoplasm by exportin 5 (XPO5). Mature miRNAs are produced by Dicer and TAR RNA-binding protein 2 (TRBP2)-mediated processing and loaded into the RISC. miRNAs function through degrading mRNA or repressing translation to regulate cancer.

while suppression of miR-126 triggered apoptosis and inhibited B-ALL progression in xenograft mice. miR-155 has been identified as an oncogene in many kinds of cancers, including colon, breast, lung, gastric and liver cancer [10–14]. In agreement with its oncogenic roles, miR-155 has been regarded as a therapeutic target in different cancers. Recently, miR-155 was further shown to be up-regulated in plexiform neurofibromas [15]. Up-regulated miR-155 increased proliferation and sphere formation of plexiform neurofibromas initiating cells. Inversely, anti-miR-155 nucleic acid decreased tumor number in mouse spontaneous plexiform neurofibromas model. miR-215 is another oncogene and up-regulated in glioblastoma by hypoxia [16]. Hypoxia-elevated miR-215 targets epigenetic regulator

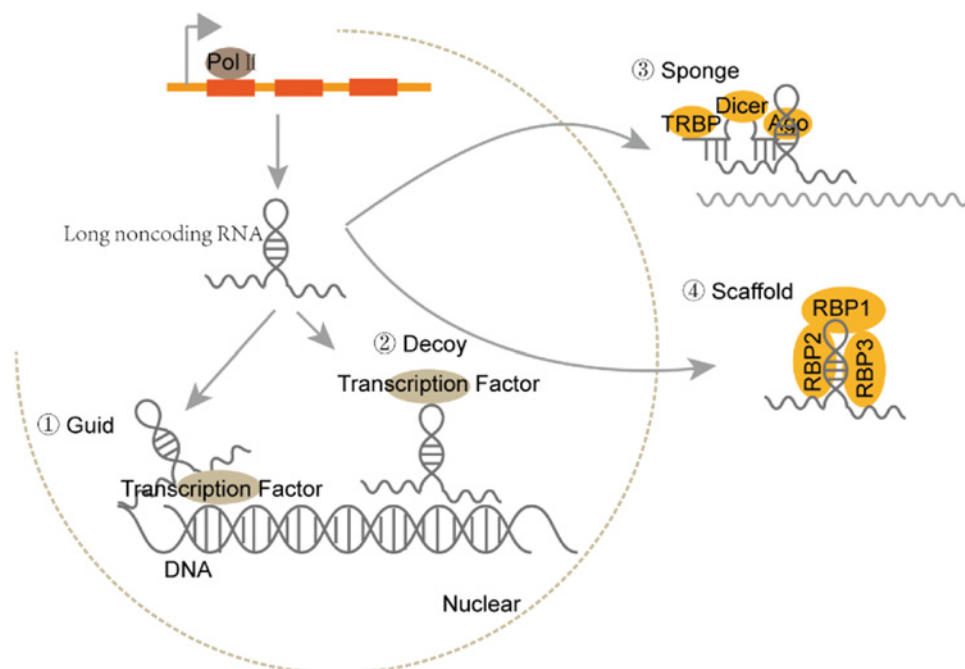

**Figure 2. The biogenesis and effector machineries of lncRNAs**

lncRNAs are transcribed by RNA polymerase II. lncRNAs function as guide molecules to recruit factors for chromatin remodeling, as decoys to hinder transcriptional factors from the promoter of target gene, as sponges of associated miRNA to prevent degradation of target gene, or as scaffolds to facilitate interaction of associated proteins.

KDM1B, to regulate the related downstream signaling and thus maintain glioblastoma initiating cell growth [17]. Some miRNAs, such as miR-105 can be secreted by cancer cells via exosome to modulate tumor microenvironment. miR-105 is highly expressed in metastatic breast cancer cells [18]. After secretion, miR-105-containing exosomes enter into endothelial monolayers and suppress the expression of the tight junction protein ZO-1, resulting in elevated vascular permeability and cancer metastasis [18]. Zhuo et al. further showed that circulating miR-105 could act as a clinical indicator of breast metastasis.

Some miRNAs have been regarded as tumor suppressors, such as let-7 and miR-34a. The let-7 miRNAs contain many family members. Most of them are down-regulated in different types of cancers, including hepatocellular carcinoma [19], non-small cell lung cancer [20], prostate cancer [21], breast cancer [22], colon cancer [23] and pancreatic cancer [24]. Let-7 miRNAs target and down-regulate many oncogenic genes including E2F1, ARID3B, K-RAS and c-Myc, resulting in suppression of tumor progression [25]. Furthermore, higher levels of let-7 indicate better prognosis in hepatocellular carcinoma and thyroid carcinoma [26]. Recently, Pablo et al. showed that let-7 also targeted Long Interspersed Element class 1 (LINE-1), the only autonomously active transposable elements highly expressed in lung cancer, to impair its translation and reduce its mobilization [27]. They proposed that Let-7 sustained somatic genome integrity by restricting LINE-1 retrotransposition. miR-34a is another tumor suppressor that plays an important role in suppressing cancer progression. We previously showed that miR-34a was critical for asymmetric division of colon cancer stem cells (CCSCs) [28]. Silencing miR-34a inhibits asymmetric cell division, promotes CCSC self-renewal and thus accelerates colon cancer progression. Kennerdell et al. also showed that miR-34a was decreased in most of the colon cancer cell lines and low levels of miR-34a predicted poor prognosis [29]. Tumor suppressor miR-29 is identified in microenvironment of chronic lymphocytic leukemia (CLL). In CLL, miR-29 targets Tumor-Necrosis Factor (TRAF4), a factor associated with CD40 activation and B-cell receptor signaling [30]. Down-regulated miR-29 elevates the expression of TRAF4 and activates CD40 signaling in CLL. Conversely, activated CD40 represses the expression of miR-29. miR-29-TRAF4-CD40 signaling axis plays as a negative feedback regulation loop in CLL. We have summarized the recent studies on miRNA functions in cancer in Table 1.

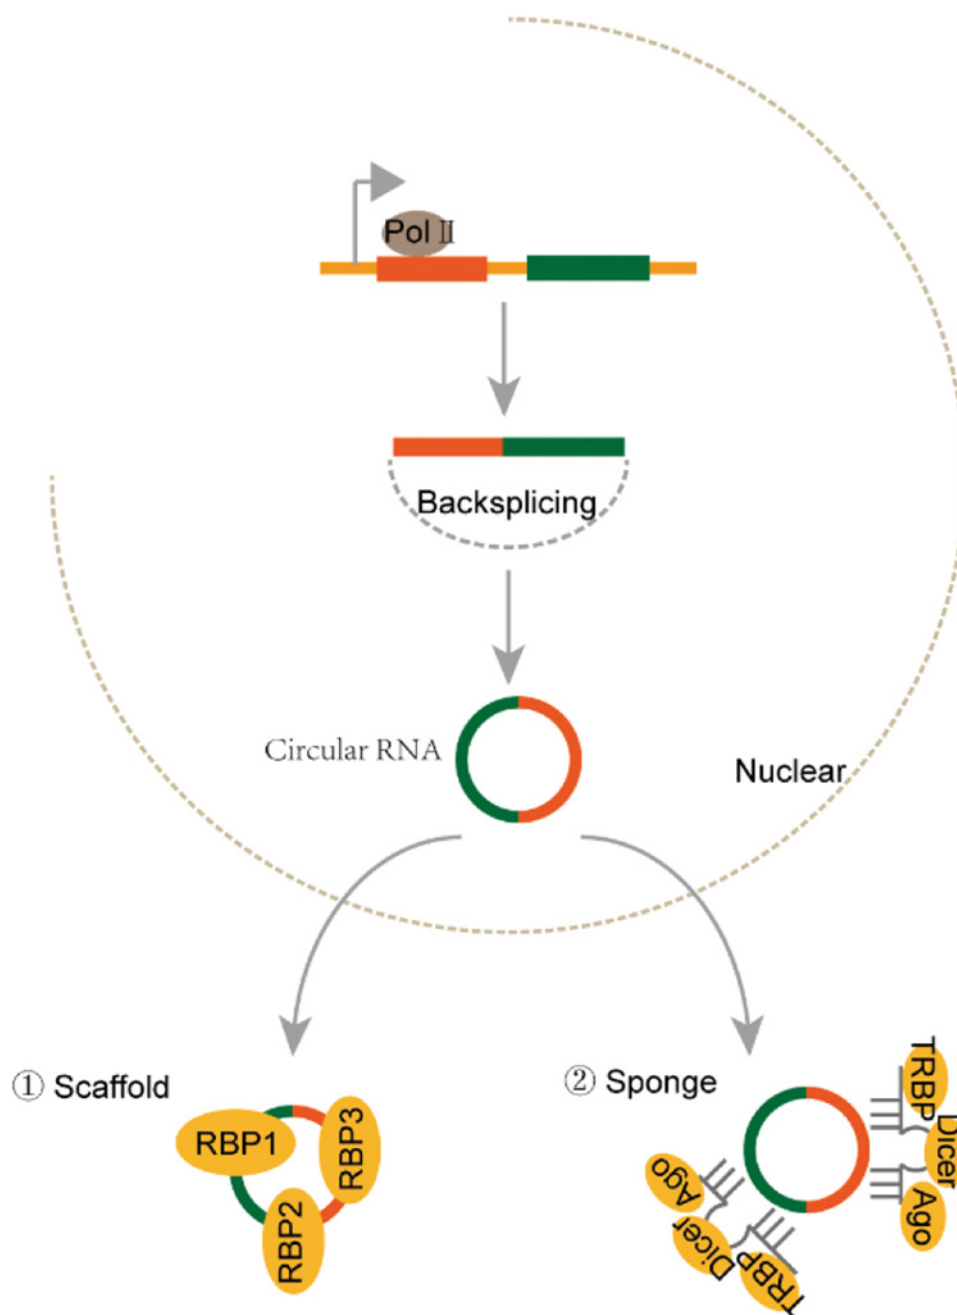

**Figure 3. The biogenesis and effector machineries of circRNAs**

circRNAs are transcribed by RNA polymerase II and cyclized by backsplicing. circRNAs function as scaffolds to facilitate interaction of associated proteins, or as miRNA sponges to prevent degradation of target gene.

## lncRNAs in cancers

Like miRNAs, lncRNAs also play as oncogenes or suppressors to regulate tumorigenesis and progression. HOTTIP, derived from *HOXA* gene, has been shown to be highly expressed in many cancers. Recently, Luo et al. demonstrated that HOTTIP played as an oncogene in acute myeloid leukemia (AML) [31]. They found that HOTTIP was aberrantly elevated in AML and worked as an epigenetic regulator to modulate hematopoietic gene-associated chromatin signature and transcription. LncTCF7 is another lncRNA transcribed from TCF gene locus. Wang et al. showed that LncTCF7 was highly expressed in liver cancer stem cells (CSCs) and was important for liver CSC self-renewal [32].

Table 1 List of miRNAs and their role in cancer development

| Cancer type | Oncogene    |                                                                      | Tumor suppressor |                                                 |
|-------------|-------------|----------------------------------------------------------------------|------------------|-------------------------------------------------|
| Breast      | let-7       | sustains self-renewing [73]                                          | miR-30           | promotes apoptosis [76]                         |
|             | miR-141     | promotes metastasis [74]                                             | miR-140          | inhibits proliferation [77]                     |
|             | mi-766      | promotes proliferation, chemoresistance, migration and invasion [75] | miR-143          | inhibits proliferation [78]                     |
| Lung        |             |                                                                      | miR-600          | inhibits stemness [79]                          |
|             |             |                                                                      | miR-7            | inhibits cell growth [80]                       |
|             |             |                                                                      | let-7            | represses expression of k-Ras [83]              |
| Ovarian     | miR-518b    | promotes proliferation and metastasis [81]                           | miR-200a         | represses EMT [84]                              |
|             | miR-629     | promotes proliferation and metastasis [82]                           |                  |                                                 |
|             | let-7       | elevates multiple drug resistance [86]                               | miR-190b         | suppresses cell growth [85]                     |
| Prostate    |             |                                                                      | miR-134-3p       | reduces multiple drug resistance [87]           |
|             | miR-141     | promotes proliferation [89]                                          | miR-126          | inhibits proliferation [88]                     |
|             |             |                                                                      | miR-145          | inhibits proliferation and invasion [90]        |
| Colorectal  |             |                                                                      | miR-34           | reduces stemness [91]                           |
|             | miR-1274a   | promotes proliferation and metastasis [92]                           | miR-137-3p       | inhibits migration [94]                         |
|             | miR-592     | promotes proliferation and clonogenicity [93]                        | miR-22           | represses invasion [95]                         |
| Brain       |             |                                                                      | miR-3622a-3p     | reduces stemness [96]                           |
|             | miR-137     | promotes proliferation [97]                                          | miR-128          | inhibits proliferation and differentiation [98] |
|             |             |                                                                      | miR-136          | promotes apoptosis [99]                         |
| Pancreatic  | miR-200b-3p | sustaining self-renewing [100]                                       | miR-142-5p       | inhibits proliferation [101]                    |
| Liver       |             |                                                                      | miR-342-3p       | inhibits proliferation [103]                    |
|             | miR-93-5p   | suppresses senescence [102]                                          | miR-1225-5p      | inhibits proliferation and invasion [104]       |
|             |             |                                                                      | miR-589          | suppresses stemness [105]                       |
| Stomach     |             |                                                                      | miR-635          | inhibits proliferation and invasion [106]       |
|             |             |                                                                      | miR-876-5p       | inhibits proliferation and invasion [107]       |
|             |             |                                                                      | miR-99           | suppresses stemness [109]                       |
| Leukemia    |             |                                                                      | miR-185          | impairs survival of drug-resistant cells [110]  |
|             | miR15/16    | Sustains stemness [108]                                              | miR-146a         | alleviates myeloma proliferation [111]          |
|             |             |                                                                      |                  |                                                 |

Mechanistically, LncTCF7 recruited SWI/SNF complex to TCF7 promoter and activated Wnt signaling for sustaining liver CSC self-renewal. Epigenetically induced lncRNA1 (EPIC1) is first identified as an oncogene in luminal B breast cancer [33]. Recently, EPIC1 has been found to be highly expressed in glioma [34], cholangiocarcinoma [35], pancreatic [36] and lung cancers [37]. Elevated EPIC1 promotes tumor growth by interacting with MYC to elevate its target genes, such as *CDKN1A*, *CCNA2* and *CDC20* [33]. Recently, Li et al. showed that linc0624, an antisense strand of CHD1L, worked as molecular decoy to segregate HDAC6–TRIM28–ZNF354C transcriptional corepressor complex away from the specific genomic loci, thus promoting the progression of hepatocellular carcinoma [38].

Some lncRNAs act as suppressors to suppress cancer development and progression. Pvt1b, a p53-dependent isoform of the lncRNA, suppresses lung cancer growth by down-regulating c-Myc expression [39]. DIRC3 is down-regulated in melanomas and its lower expression level is associated with shorter survival [40]. Further study reveals that DIRC3 inhibits proliferation of melanoma cells via elevating the expression of tumor suppressor IGFBP5. Recently, SATB2-AS1, an antisense transcript of tumor suppressor SATB2, has also been shown to be down-regulated in colorectal cancer. Knockdown of SATB-AS1 significantly increases cell proliferation, migration and invasion [41]. Mechanistically, SATB-AS1 works as a scaffold to recruit p300 to SATB2 promoter, up-regulating SATB2. Elevated

SATB2 recruits HDAC1 to Snail promoter, suppressing Snail expression and epithelial-to-mesenchymal transition. MALAT1, a nuclear lncRNA, is also a tumor suppressor in breast cancer. Jong et al. showed that knockout of MALAT1 promoted breast cancer metastasis through disrupting the recruitment of transcription factor TEAD and co-activator YAP to the target gene promoters [42]. We have summarized the recent studies on lncRNA functions in cancer in Table 2.

## **circRNAs in cancers**

circRNAs are recently identified ncRNA type and act as either tumor suppressors or oncogenes. For instance, circCDYL is down-regulated in colon cancer, bladder cancer and triple-negative breast cancer and its underexpression is positively correlated with patient survival [43]. Further studies shows that overexpression of circCDYL promotes apoptosis and inhibits proliferation of breast cancer cells [44]. Mechanically, circCDYL functions as a sponge to protect TP53INP1 from miR-190a-3p-mediated down-regulation [45]. The expression of circFOXO3 is lower in the breast cancers compared with that in adjacent benign tissues [46]. Interestingly, circFOXO3 works not only as an miRNA sponge to protect Foxo3 mRNA from attack, but also as a scaffold to bridge p21 and CDK2 to inhibit cell cycle progression [47].

In contrast with the tumor suppressive roles, some circRNAs have been identified as oncogenes. circ-CCAC1, also known as cholangiocarcinoma-associated circular RNA1, is highly expressed in cholangiocarcinoma and cholangiocarcinoma-derived endothelial vessels [48]. In tumor cells, circCCAC1 recruits miR-514a-5p to up-regulate YY1 and its downstream gene *CAMLG*, which elevates the cell activity [48]. In endothelial vessels, circ-CCAC1 up-regulates SH3GL2 by sequestering EZH2, thus reducing intercellular junction protein levels and increasing cell leakiness [48]. circRNAHIPK3 derived from exon 2 of *HIPK3* gene is highly expressed in many types of cancer, including glioma [49], prostate cancer [50], breast cancer [51], colorectal cancer [52] and renal cancer [53]. Through screening of 424 miRNAs, 9 miRNAs showed great suppressive ability on the HIPK3 exon 2. Interestingly, all the nine miRNAs have been identified as tumor suppressors and suppressed by circHIPK3 [54]. These studies demonstrate that the expression of circRNAs is dynamically regulated in different cancers, and regulates cancer progression through distinct mechanisms. We have summarized the recent studies on circRNA functions in cancer in Table 3.

## **piwiRNAs in cancers**

Generally, piRNAs are expressed in the germline, but recent studies have demonstrated that piRNAs are also expressed in cancer cells, where piRNAs play crucial role in repression of transposable elements cleaving, deadenylation and decay. For instance, piRNA-823 has been identified to regulate proliferation and migration of a variety of cancer cells [55,56]. In multiple myeloma (MM), silencing piRNA-823 induces the expression of apoptosis-related genes by modulating *de novo* DNA methylation [57]. In colorectal cancer, inhibition of piR-823 suppresses cell proliferation and induces cell apoptosis by activating apoptosis-associated transcription factor HSF1 [58]. Cordeiro et al. examined several piRNA pathways in classical Hodgkin lymphoma and found that piR-651 was down-regulated in classic Hodgkin lymphoma patients compared with that in healthy controls. In addition, low levels of piR-651 are positively correlated with short overall survival of the classic Hodgkin lymphoma patients [59]. piRNA-54265 is highly expressed in cancer tissue and serum of the colorectal cancer patients. piRNA-54265 activates STAT3 signaling by facilitating PIWIL2/STAT3/SRC complex assemble [60]. Thus, piRNAs are also important for cancer progression.

## **Targeting ncRNAs in cancer therapy**

Recently, several ncRNAs have been used as novel therapeutic targets to treat cancers. Considering different roles of ncRNAs in specific cancer types, ncRNA mimics, antisense oligonucleotides (ASOs) or small molecule drugs have been applied for the treatment of cancers. miR-34a mimic packaged in a liposomal nanoparticle, called MRX34, has gone through a phase I clinical trial in patients with advanced solid tumor [61]. Moreover, miR-31-3p and miR-31-5p have been considered as colorectal cancer predictive biomarkers in phase III clinical trial [62,63]. Li et al. took a computational approach to design and identify small molecules on the base of the predicted miRNA hairpin precursor structures. They found that a benzimidazole analog selectively inhibited the processing of pri-miR-96 into oncogenic miR-96 and thus elevated miR-96 target gene expression and promoted cancer cell apoptosis [64]. Further optimization of benzimidazole turns out a dimeric benzimidazole and bisbenzimidazole compound, targaprimir-96, which shows a favorable pharmacokinetics profile and is effective at releasing tumor burden in a triple-negative breast cancer xenograft mouse model [65]. Another dimeric benzimidazole and bisbenzimidazole analog, targaprimir (TGP)-515, is

**Table 2** List of lncRNAs and their role in cancer development

| Cancer type | Oncogene | Tumor suppressor                                                        |       |               |                                                             |       |
|-------------|----------|-------------------------------------------------------------------------|-------|---------------|-------------------------------------------------------------|-------|
| Breast      | 00617    | promotes metastasis                                                     | [112] | SCI RT        | restrains transcriptional program of tumor-initiating cells | [121] |
|             | XIST     | promotes proliferation and inhibit apoptosis                            | [113] |               |                                                             |       |
|             | H19      | promotes stemness                                                       | [114] | PVT1          | inhibits cell growth                                        | [122] |
|             | ROR      | elevates multiple drug resistance                                       | [115] |               |                                                             |       |
|             | HOTAIR   | promotes proliferation and metastasis                                   | [116] |               |                                                             |       |
|             | 01271    | promotes metastasis                                                     | [117] |               |                                                             |       |
|             | DILA1    | promotes proliferation and multiple drug resistance                     | [118] |               |                                                             |       |
|             | ERINA    | promotes cell-cycle progression                                         | [119] |               |                                                             |       |
|             | TROJAN   | promotes proliferation and invasion                                     | [120] |               |                                                             |       |
| Ovarian     | HOTAIR   | promotes stemness                                                       | [123] | ROR           | inhibits proliferation                                      | [129] |
|             | LINP1    | promotes proliferation and invasion                                     | [124] |               |                                                             |       |
| Brain       | HAS2-AS1 | promotes invasion                                                       | [125] |               |                                                             |       |
|             | H19      | promotes angiogenesis                                                   | [126] |               |                                                             |       |
|             | CRNDE    | promotes proliferation and invasion                                     | [127] | DILC          | suppresses stemness                                         | [136] |
|             | XIST     | promotes proliferation and invasion                                     | [128] |               |                                                             |       |
| Liver       | HOTAIR   | promotes proliferation and invasion                                     | [130] | PTENP1        | suppresses proliferation and invasion                       | [137] |
|             | β-Catm   | sustains self-renewing                                                  | [131] | TSLNC8        | suppresses proliferation and metastasis                     | [137] |
|             | TRG-AS1  | promotes proliferation and invasion                                     | [132] |               |                                                             |       |
|             | HUR1     | promotes proliferation                                                  | [133] |               |                                                             |       |
|             | 01138    | promotes proliferation, invasion and metastasis                         | [134] | TCAM1P-004    | inhibits cell growth, cell survival and transformation      | [138] |
|             | MALAT1   | promotes proliferation and inhibit apoptosis                            | [135] | RP11-598D14.1 | inhibits cell growth, cell survival and transformation      | [138] |
| Colon       | URHC     | promotes proliferation and invasion                                     | [139] | PGM5-AS1      | inhibits proliferation and invasion                         | [142] |
|             | CCAT2    | elevates chromosomal instability and promote proliferation and invasion | [140] | 00959         | suppresses migration and invasion                           | [143] |
| Lung        | PURPL    | promotes cell growth                                                    | [141] | 00261         | active DNA damage response and block proliferation          | [146] |
|             | TRINGS   | protects cancer cells from necrosis                                     | [143] |               |                                                             |       |
|             | MIR22HG  | promotes cell survival                                                  | [144] |               |                                                             |       |
| Leukemia    | GUARDIN  | sustains genomic stability and prevent apoptosis and senescence         | [145] | PANDA         | inhibits cell growth                                        | [148] |
|             | CRNDE    | promotes proliferation                                                  | [147] |               |                                                             |       |

**Table 3** List of circRNAs and their role in cancer development

| Cancer type | Oncogene |                                                                       | Tumor suppressor |                                                         |
|-------------|----------|-----------------------------------------------------------------------|------------------|---------------------------------------------------------|
| Breast      | UBE2D2   | elevates multiple drug resistance [149]                               | 000554           | represses EMT [152]                                     |
|             |          |                                                                       | HIPK3            | inhibits proliferation and invasion [153]               |
|             | DCAF6    | sustains stemness [150]                                               |                  |                                                         |
| Lung        | DNMT1    | activates autophagy [151]                                             |                  |                                                         |
|             | MYLK     | promotes glycolysis and proliferation [154]                           |                  |                                                         |
|             | CPA4     | promotes stemness [155]                                               |                  |                                                         |
| Colon       | LDLRAD3  | promotes proliferation and survival [156]                             |                  |                                                         |
|             | UBAP2    | promotes proliferation and metastasis [157]                           |                  |                                                         |
| Brain       | POSTN    | promotes proliferation and metastasis [158]                           | SHPRH            | suppresses proliferation [159]                          |
| Liver       | 0000517  | promotes glycolysis and clonogenicity [160]                           |                  |                                                         |
|             | 0067934  | promotes proliferation and metastasis [161]                           |                  |                                                         |
|             | ASAP1    | promotes proliferation, colony formation migration and invasion [162] |                  |                                                         |
| Gastric     | CDYL     | sustains stemness [163]                                               |                  |                                                         |
|             | 10720    | promotes EMT [164]                                                    |                  |                                                         |
|             | 0000144  | promotes proliferation and clonogenicity [165]                        |                  |                                                         |
| Ovarian     | NRIP1    | promotes proliferation and glycolysis [166]                           |                  |                                                         |
|             | FGFR3    | promotes proliferation and EMT [167]                                  | 9119             | suppresses proliferation [169]                          |
|             |          |                                                                       | ITCH             | suppresses proliferation, invasion and glycolysis [170] |
|             | UBAP2    | promotes proliferation and inhibits apoptosis [168]                   | MTO1             | suppresses proliferation and invasion [171]             |

identified to target pri-miR-515, resulting in up-regulation of human epidermal growth factor receptor 2 and enhancement of the therapeutic efficacy of the anti-human epidermal growth factor receptor 2 antibody in breast cancer cells [66]. Likewise, a bisbenzimidazole analog called targapremir-210, also called TGP-210, is identified to bind to pre-miR-210, leading to the inhibition of processing of mature miR-210 and suppressing the outgrowth of xenograft tumors in mice [67]. The attachment of a nuclease recruitment module on to targapremir-210 offers a conjugate, TGP-210-RL, which is able to recruit RNase L on to pre-miR-210 to induce the degradation of pre-miR-210. Compared with TGP-210, TGP-210-RL conjugate exhibits higher binding affinity to the pre-miR-210 while lower affinity to DNA [68]. Recently, an oligonucleotide inhibitor of miR-155, called cobomarsen, has been reported to decrease cell proliferation and induces cell apoptosis in Diffuse Large B-cell Lymphoma. Clinically, this compound efficiently inhibits tumor growth without obvious side effects on the patients, supporting its potential therapeutic application in Diffuse Large B-cell or other types of Lymphoma [69]. Further computational and experimental studies demonstrates that mitoxantrone is able to directly bind to pre-miR-21 and subsequently inhibits Dicer-mediated biogenesis of oncogenic miR-21 [70]. Several studies have demonstrated that ASOs can be used as inhibitors to block lncRNAs [71]. In mouse model, ASOs targeting MALAT1 blocks metastasis of lung cancer cells [72]. Together, targeting ncRNAs has been showing a promising approach for cancer therapy.

## Conclusion

ncRNAs contain various classes and participate in regulation of the progression of various types of cancers. Some ncRNAs highly exist in serum or urine of the cancer patient and are capable to work as diagnostic markers or prognostic indicators. Many clinical trials have also been conducted by targeting ncRNAs and exhibited promising therapeutic effects. With deep investigation of the mechanisms, we have been broadening our understanding of ncRNA functions. For instance, miRNAs are originally considered to suppress target gene expression by binding to the 3'-UTR regions. Recently, we have realized that miRNAs could also bind to other regions of the genes and even up-regulate target gene expression. Now we also know that some lncRNAs actually can encode small peptides to regulate biological processes. However, there are still many unknown ncRNAs, particularly the new ncRNA classes with precise roles need to be investigated. Even for the well-known ncRNAs, their function and regulatory mechanisms could be changed with spatial-temporal alteration, such as expression pattern, structure and interacting proteins. Therefore, efforts still need to make to understand the precise function and mechanisms of the ncRNAs.

Targeting ncRNA therapies have been conducted in many clinical trials. Emerging technologies and new approaches will contribute to even better outcomes. For instance, targeting ncRNA approaches could be co-operated with immune therapy or other therapeutic treatments. Human organoids can be used for investigating functions or preclinical effects of ncRNAs in patients. Targeting ncRNAs by CRISPR-mediated gene editing may also be worth trying for certain diseases. Many ncRNAs both functions in physiology and pathology. Therefore, deep investigation of the function and mechanism will help to identify the ncRNAs specifically regulating cancers and reduce the adverse side effects. Overall, ncRNAs are heavily involved in regulating various cancers and targeting ncRNAs have exhibit promising therapeutic effect, while we still need to keep making efforts to reveal the mystery of ncRNA functions.

## Summary

- ncRNAs work as oncogenes or tumor suppressors to regulate carcinogenesis and progression.
- ncRNAs regulate cancer progression through distinct mechanisms and represent potential drug targets or therapeutic entities.
- Clinical trials have been conducted to treat cancers by targeting ncRNAs and exhibited promising therapeutic effect.

## Competing Interests

The authors declare that there are no competing interests associated with the manuscript.

## Funding

This work was partly supported by the Strategic Priority Research Program of the Chinese Academy of Sciences [grant number XDB29040100]; the Chinese Ministry of Science and Technology [grant number 2017YFA0504103]; and the National Natural Science Foundation of China [grant numbers 31771513, 81972797].

## Author Contribution

Huiwen Yan wrote the manuscript. Pengcheng Bu reviewed and edited the manuscript.

## Abbreviations

AML, acute myeloid leukemia; ASO, antisense oligonucleotide; CCSC, colon cancer stem cell; circRNA, circular RNA; CLL, chronic lymphocytic leukemia; CSC, cancer stem cell; EPIC1, epigenetically induced lncRNA1; LINE-1, long interspersed element class 1; lncRNA, long non-coding RNA; miRNA, microRNA; ncRNA, non-coding RNA; nt, nucleotide; piRNA, PIWI interacting RNA; TRAF4, tumor-necrosis factor 4; B-ALL, B cell acute lymphocytic leukemia.

## References

- 1 Kimura, T. (2020) Non-coding natural antisense RNA: mechanisms of action in the regulation of target gene expression and its clinical implications. *Yakugaku Zasshi* **140**, 687–700, <https://doi.org/10.1248/yakushi.20-00002>

- 2 Vos, P.D., Leedman, P.J., Filipovska, A. and Rackham, O. (2019) Modulation of miRNA function by natural and synthetic RNA-binding proteins in cancer. *Cell. Mol. Life Sci.* **76**, 3745–3752, <https://doi.org/10.1007/s00018-019-03163-9>
- 3 Zeng, Q., Wan, H., Zhao, S., Xu, H., Tang, T., Oware, K.A. et al. (2020) Role of PIWI-interacting RNAs on cell survival: proliferation, apoptosis, and cycle. *IUBMB Life* **79**, 1870–1878, <https://doi.org/10.1002/iub.2332>
- 4 Wang, N., Yu, Y., Xu, B., Zhang, M., Li, Q. and Miao, L. (2019) Pivotal prognostic and diagnostic role of the long noncoding RNA colon cancer-associated transcript 1 expression in human cancer (Review). *Mol. Med. Rep.* **19**, 771–782, <https://doi.org/10.3892/mmr.2018.9721>
- 5 Zhao, W., An, Y., Liang, Y. and Xie, X.W. (2014) Role of HOTAIR long noncoding RNA in metastatic progression of lung cancer. *Eur. Rev. Med. Pharmacol. Sci.* **18**, 1930–1936
- 6 Li, F. (2019) Expression and correlation of miR-124 and miR-126 in breast cancer. *Oncol. Lett.* **17**, 5115–5119, <https://doi.org/10.3892/ol.2019.10184>
- 7 Ebrahimi, F., Gopalan, V., Wahab, R., Lu, C.T., Smith, R.A. and Lam, A.K. (2015) Deregulation of miR-126 expression in colorectal cancer pathogenesis and its clinical significance. *Exp. Cell. Res.* **339**, 333–341, <https://doi.org/10.1016/j.yexcr.2015.10.004>
- 8 Lechman, E.R., Gentner, B., Ng, S.W.K., Schoof, E.M., van Galen, P., Kennedy, J.A. et al. (2016) miR-126 regulates distinct self-renewal outcomes in normal and malignant hematopoietic stem cells. *Cancer Cell* **29**, 602–606, <https://doi.org/10.1016/j.ccell.2016.03.015>
- 9 Chen, S.R., Cai, W.P., Dai, X.J., Guo, A.S., Chen, H.P., Lin, G.S. et al. (2019) Research on miR-126 in glioma targeted regulation of PTEN/PI3K/Akt and MDM2-p53 pathways. *Eur. Rev. Med. Pharmacol. Sci.* **23**, 3461–3470
- 10 Al-Haidari, A.A., Syk, I. and Thorlacius, H. (2017) MiR-155-5p positively regulates CCL17-induced colon cancer cell migration by targeting RhoA. *Oncotarget* **8**, 14887–14896, <https://doi.org/10.18632/oncotarget.14841>
- 11 Luan, T., Zhang, X., Wang, S., Song, Y., Zhou, S., Lin, J. et al. (2017) Long non-coding RNA MIAT promotes breast cancer progression and functions as ceRNA to regulate DUSP7 expression by sponging miR-155-5p. *Oncotarget* **8**, 76153–76164, <https://doi.org/10.18632/oncotarget.19190>
- 12 Shao, C., Yang, F., Qin, Z., Jing, X., Shu, Y. and Shen, H. (2019) The value of miR-155 as a biomarker for the diagnosis and prognosis of lung cancer: a systematic review with meta-analysis. *BMC Cancer* **19**, 1103, <https://doi.org/10.1186/s12885-019-6297-6>
- 13 Prinz, C. and Weber, D. (2020) MicroRNA (miR) dysregulation during Helicobacter pylori-induced gastric inflammation and cancer development: critical importance of miR-155. *Oncotarget* **11**, 894–904, <https://doi.org/10.18632/oncotarget.27520>
- 14 Yu, Q., Xu, X.P., Yin, X.M. and Peng, X.Q. (2020) miR-155-5p increases the sensitivity of liver cancer cells to adriamycin by regulating ATG5-mediated autophagy. *Neoplasma* **68**, 87–95, [https://doi.org/10.4149/neo\\_2020\\_200106N17](https://doi.org/10.4149/neo_2020_200106N17)
- 15 Na, Y., Hall, A., Choi, K., Hu, L., Rose, J., Coover, R.A. et al. (2020) MicroRNA-155 contributes to plexiform neurofibroma growth downstream of MEK. *Oncogene* **40**, 951–963, <https://doi.org/10.1038/s41388-020-01581-9>
- 16 Hu, J. and Wang, X.F. (2016) HIF-miR-215-KDM1B promotes glioma-initiating cell adaptation to hypoxia. *Cell Cycle* **15**, 1939–1940, <https://doi.org/10.1080/15384101.2016.1181877>
- 17 Hu, J., Sun, T., Wang, H., Chen, Z., Wang, S., Yuan, L. et al. (2016) MiR-215 is induced post-transcriptionally via HIF-Drosha complex and mediates glioma-initiating cell adaptation to hypoxia by targeting KDM1B. *Cancer Cell* **29**, 49–60, <https://doi.org/10.1016/j.ccell.2015.12.005>
- 18 Zhou, W., Fong, M.Y., Min, Y., Somlo, G., Liu, L., Palomares, M.R. et al. (2014) Cancer-secreted miR-105 destroys vascular endothelial barriers to promote metastasis. *Cancer Cell* **25**, 501–515, <https://doi.org/10.1016/j.ccr.2014.03.007>
- 19 Jin, B., Wang, W., Meng, X.X., Du, G., Li, J., Zhang, S.Z. et al. (2016) Let-7 inhibits self-renewal of hepatocellular cancer stem-like cells through regulating the epithelial-mesenchymal transition and the Wnt signaling pathway. *BMC Cancer* **16**, 863, <https://doi.org/10.1186/s12885-016-2904-y>
- 20 Li, X.X., Di, X., Cong, S., Wang, Y. and Wang, K. (2018) The role of let-7 and HMGA2 in the occurrence and development of lung cancer: a systematic review and meta-analysis. *Eur. Rev. Med. Pharmacol. Sci.* **22**, 8353–8366
- 21 Wagner, S., Ngezahayo, A., Murua Escobar, H. and Nolte, I. (2014) Role of miRNA let-7 and its major targets in prostate cancer. *Biomed. Res. Int.* **2014**, 376326, <https://doi.org/10.1155/2014/376326>
- 22 Thammaiah, C.K. and Jayaram, S. (2016) Role of let-7 family microRNA in breast cancer. *Noncoding RNA Res.* **1**, 77–82, <https://doi.org/10.1016/j.ncrna.2016.10.003>
- 23 Mizuno, R., Kawada, K. and Sakai, Y. (2018) The molecular basis and therapeutic potential of Let-7 microRNAs against colorectal cancer. *Can. J. Gastroenterol. Hepatol.* **2018**, 5769591, <https://doi.org/10.1155/2018/5769591>
- 24 Nweke, E.E. and Brand, M. (2020) Downregulation of the let-7 family of microRNAs may promote insulin receptor/insulin-like growth factor signalling pathways in pancreatic ductal adenocarcinoma. *Oncol. Lett.* **20**, 2613–2620, <https://doi.org/10.3892/ol.2020.11854>
- 25 Chirshv, E., Oberg, K.C., Ioffe, Y.J. and Unteraehrer, J.J. (2019) Let-7 as biomarker, prognostic indicator, and therapy for precision medicine in cancer. *Clin. Transl. Med.* **8**, 24, <https://doi.org/10.1186/s40169-019-0240-y>
- 26 Perdas, E., Stawski, R., Kaczka, K. and Zubrzycka, M. (2020) Analysis of Let-7 family miRNA in plasma as potential predictive biomarkers of diagnosis for papillary thyroid cancer. *Diagnostics (Basel)* **10**, 130–134, <https://doi.org/10.3390/diagnostics10030130>
- 27 Tristan-Ramos, P., Rubio-Roldan, A., Peris, G., Sanchez, L., Amador-Cubero, S., Viollet, S. et al. (2020) The tumor suppressor microRNA let-7 inhibits human LINE-1 retrotransposition. *Nat. Commun.* **11**, 5712, <https://doi.org/10.1038/s41467-020-19430-4>
- 28 Bu, P., Wang, L., Chen, K.Y., Srinivasan, T., Murthy, P.K., Tung, K.L. et al. (2016) A miR-34a-numb feedforward loop triggered by inflammation regulates asymmetric stem cell division in intestine and colon cancer. *Cell Stem Cell* **18**, 189–202, <https://doi.org/10.1016/j.stem.2016.01.006>
- 29 Kennerdell, J.R., Liu, N. and Bonini, N.M. (2018) MiR-34 inhibits polycomb repressive complex 2 to modulate chaperone expression and promote healthy brain aging. *Nat. Commun.* **9**, 4188, <https://doi.org/10.1038/s41467-018-06592-5>
- 30 Sharma, S., Pavlasova, G.M., Seda, V., Cerna, K.A., Vojackova, E., Filip, D. et al. (2020) miR-29 modulates CD40 signaling in chronic lymphocytic leukemia by targeting TRAF4: an axis affected by BCR inhibitors. *blood.2020005627*, <https://doi.org/10.1182/blood.2020005627>
- 31 Luo, H., Zhu, G., Xu, J., Lai, Q., Yan, B., Guo, Y. et al. (2019) HOTTIP lncRNA promotes hematopoietic stem cell self-renewal leading to AML-like disease in mice. *Cancer Cell* **36**, 645.e8–659.e8, <https://doi.org/10.1016/j.ccell.2019.10.011>

- 32 Wang, Y., He, L., Du, Y., Zhu, P., Huang, G., Luo, J. et al. (2015) The long noncoding RNA lncTCF7 promotes self-renewal of human liver cancer stem cells through activation of Wnt signaling. *Cell Stem Cell* **16**, 413–425, <https://doi.org/10.1016/j.stem.2015.03.003>
- 33 Wang, Z., Yang, B., Zhang, M., Guo, W., Wu, Z., Wang, Y. et al. (2018) lncRNA epigenetic landscape analysis identifies EPIC1 as an oncogenic lncRNA that interacts with MYC and Promotes cell-cycle progression in cancer. *Cancer Cell* **33**, 706e9–720e9, <https://doi.org/10.1016/j.ccell.2018.03.006>
- 34 Wang, J., Yang, S., Ji, Q., Li, Q., Zhou, F., Li, Y. et al. (2020) Long non-coding RNA EPIC1 promotes cell proliferation and motility and drug resistance in glioma. *Mol. Ther. Oncol.* **17**, 130–137, <https://doi.org/10.1016/j.omto.2020.03.011>
- 35 Li, Y., Cai, Q., Li, W., Feng, F. and Yang, L. (2018) Long non-coding RNA EPIC1 promotes cholangiocarcinoma cell growth. *Biochem. Biophys. Res. Commun.* **504**, 654–659, <https://doi.org/10.1016/j.bbrc.2018.08.174>
- 36 Xia, P., Liu, P., Fu, Q., Liu, C., Luo, Q., Zhang, X. et al. (2020) Long noncoding RNA EPIC1 interacts with YAP1 to regulate the cell cycle and promote the growth of pancreatic cancer cells. *Biochem. Biophys. Res. Commun.* **522**, 978–985, <https://doi.org/10.1016/j.bbrc.2019.11.167>
- 37 Zhang, B., Lu, H.Y., Xia, Y.H., Jiang, A.G. and Lv, Y.X. (2018) Long non-coding RNA EPIC1 promotes human lung cancer cell growth. *Biochem. Biophys. Res. Commun.* **503**, 1342–1348, <https://doi.org/10.1016/j.bbrc.2018.07.046>
- 38 Li, Z., Lu, X., Liu, Y., Zhao, J., Ma, S., Yin, H. et al. (2020) Gain of LINC00624 enhances liver cancer progression by disrupting the HDAC6-TRIM28-ZNF354C corepressor complex. *Hepatology*, <https://doi.org/10.1002/hep.31530>
- 39 Olivero, C.E., Martinez-Terroba, E., Zimmer, J., Liao, C., Tesfaye, E., Hooshdaran, N. et al. (2020) p53 activates the long noncoding RNA Pvt1b to inhibit Myc and suppress tumorigenesis. *Mol. Cell* **77**, 761e8–774e8, <https://doi.org/10.1016/j.molcel.2019.12.014>
- 40 Coe, E.A., Tan, J.Y., Shapiro, M., Louphrasitthiphol, P., Bassett, A.R., Marques, A.C. et al. (2019) The MITF-SOX10 regulated long non-coding RNA DIRC3 is a melanoma tumour suppressor. *PLoS Genet.* **15**, e1008501, <https://doi.org/10.1371/journal.pgen.1008501>
- 41 Wang, Y.Q., Jiang, D.M., Hu, S.S., Zhao, L., Wang, L., Yang, M.H. et al. (2019) SATB2-AS1 suppresses colorectal carcinoma aggressiveness by inhibiting SATB2-dependent Snail transcription and epithelial-mesenchymal transition. *Cancer Res.* **79**, 3542–3556, <https://doi.org/10.1158/0008-5472.CAN-18-2900>
- 42 Kim, J., Piao, H.L., Kim, B.J., Yao, F., Han, Z., Wang, Y. et al. (2018) Long noncoding RNA MALAT1 suppresses breast cancer metastasis. *Nat. Genet.* **50**, 1705–1715, <https://doi.org/10.1038/s41588-018-0252-3>
- 43 Wang, S., Liu, F., Ma, H., Cui, X., Yang, S. and Qin, R. (2020) circCDYL acts as a tumor suppressor in triple negative breast cancer by sponging miR-190a-3p and upregulating TP53INP1. *Clin. Breast Cancer* **20**, 422–430, <https://doi.org/10.1016/j.clbc.2020.04.006>
- 44 Liang, G., Ling, Y., Mehrpour, M., Saw, P.E., Liu, Z., Tan, W. et al. (2020) Autophagy-associated circRNA circCDYL augments autophagy and promotes breast cancer progression. *Mol. Cancer* **19**, 65, <https://doi.org/10.1186/s12943-020-01152-2>
- 45 Wang, S., Liu, F., Ma, H., Cui, X., Yang, S. and Qin, R. (2020) circCDYL acts as a tumor suppressor in triple negative breast cancer by sponging miR-190a-3p and upregulating TP53INP1. *Clin. Breast Cancer* **20**, 422–430, <https://doi.org/10.1016/j.clbc.2020.04.006>
- 46 Du, W.W., Fang, L., Yang, W., Wu, N., Awan, F.M., Yang, Z. et al. (2017) Induction of tumor apoptosis through a circular RNA enhancing Foxo3 activity. *Cell Death Differ.* **24**, 357–370, <https://doi.org/10.1038/cdd.2016.133>
- 47 Du, W.W., Yang, W., Liu, E., Yang, Z., Dhaliwal, P. and Yang, B.B. (2016) Foxo3 circular RNA retards cell cycle progression via forming ternary complexes with p21 and CDK2. *Nucleic Acids Res.* **44**, 2846–2858, <https://doi.org/10.1093/nar/gkw027>
- 48 Xu, Y., Leng, K., Yao, Y., Kang, P., Liao, G., Han, Y. et al. (2021) A circular RNA, Cholangiocarcinoma-Associated Circular RNA 1, contributes to cholangiocarcinoma progression, induces angiogenesis, and disrupts vascular endothelial barriers. *Hepatology* **73**, 1419–1435, <https://doi.org/10.1002/hep.31493>
- 49 Liu, Z., Guo, S., Sun, H., Bai, Y., Song, Z. and Liu, X. (2020) Circular RNA CircHIPK3 elevates CCND2 expression and promotes cell proliferation and invasion through miR-124 in glioma. *Front. Genet.* **11**, 1013, <https://doi.org/10.3389/fgene.2020.01013>
- 50 Chen, D., Lu, X., Yang, F. and Xing, N. (2019) Circular RNA circHIPK3 promotes cell proliferation and invasion of prostate cancer by sponging miR-193a-3p and regulating MCL1 expression. *Cancer Manag. Res.* **11**, 1415–1423, <https://doi.org/10.2147/CMAR.S190669>
- 51 Chen, Z.G., Zhao, H.J., Lin, L., Liu, J.B., Bai, J.Z. and Wang, G.S. (2020) Circular RNA CircHIPK3 promotes cell proliferation and invasion of breast cancer by sponging miR-193a/HMGB1/PI3K/AKT axis. *Thorac. Cancer* **11**, 2660–2671, <https://doi.org/10.1111/1759-7714.13603>
- 52 Yan, Y., Su, M. and Qin, B. (2020) CircHIPK3 promotes colorectal cancer cells proliferation and metastasis via modulating of miR-1207-5p/FMN2 signal. *Biochem. Biophys. Res. Commun.* **524**, 839–846, <https://doi.org/10.1016/j.bbrc.2020.01.055>
- 53 Han, B., Shaolong, E., Luan, L., Li, N. and Liu, X. (2020) CircHIPK3 promotes clear cell renal cell carcinoma (ccRCC) cells proliferation and metastasis via altering of miR-508-3p/CXCL13 signal. *Onco Targets Ther.* **13**, 6051–6062, <https://doi.org/10.2147/OTT.S251436>
- 54 Hu, D. and Zhang, Y. (2019) Circular RNA HIPK3 promotes glioma progression by binding to miR-124-3p. *Gene* **690**, 81–89, <https://doi.org/10.1016/j.gene.2018.11.073>
- 55 Feng, J., Yang, M., Wei, Q., Song, F., Zhang, Y., Wang, X. et al. (2020) Novel evidence for oncogenic piRNA-823 as a promising prognostic biomarker and a potential therapeutic target in colorectal cancer. *J. Cell. Mol. Med.*, <https://doi.org/10.1111/jcmm.15537>
- 56 Yan, H., Wu, Q.L., Sun, C.Y., Ai, L.S., Deng, J., Zhang, L. et al. (2015) piRNA-823 contributes to tumorigenesis by regulating de novo DNA methylation and angiogenesis in multiple myeloma. *Leukemia* **29**, 196–206, <https://doi.org/10.1038/leu.2014.135>
- 57 Li, B., Hong, J., Hong, M., Wang, Y., Yu, T., Zang, S. et al. (2019) piRNA-823 delivered by multiple myeloma-derived extracellular vesicles promoted tumorigenesis through re-educating endothelial cells in the tumor environment. *Oncogene* **38**, 5227–5238, <https://doi.org/10.1038/s41388-019-0788-4>
- 58 Yin, J., Jiang, X.Y., Qi, W., Ji, C.G., Xie, X.L., Zhang, D.X. et al. (2017) piR-823 contributes to colorectal tumorigenesis by enhancing the transcriptional activity of HSF1. *Cancer Sci.* **108**, 1746–1756, <https://doi.org/10.1111/cas.13300>
- 59 Cordeiro, A., Navarro, A., Gaya, A., Diaz-Beya, M., Gonzalez-Farre, B., Castellano, J.J. et al. (2016) PiwiRNA-651 as marker of treatment response and survival in classical Hodgkin lymphoma. *Oncotarget* **7**, 46002–46013, <https://doi.org/10.18632/oncotarget.10015>

- 60 Mai, D., Zheng, Y., Guo, H., Ding, P., Bai, R., Li, M. et al. (2020) Serum piRNA-54265 is a new biomarker for early detection and clinical surveillance of human colorectal cancer. *Theranostics* **10**, 8468–8478, <https://doi.org/10.7150/thno.46241>
- 61 Hong, D.S., Kang, Y.K., Borad, M., Sachdev, J., Ejadi, S., Lim, H.Y. et al. (2020) Phase 1 study of MRX34, a liposomal miR-34a mimic, in patients with advanced solid tumours. *Br. J. Cancer* **122**, 1630–1637, <https://doi.org/10.1038/s41416-020-0802-1>
- 62 Anandappa, G., Lampis, A., Cunningham, D., Khan, K.H., Kouvelakis, K., Vlachogiannis, G. et al. (2019) miR-31-3p expression and benefit from anti-EGFR inhibitors in metastatic colorectal cancer patients enrolled in the Prospective Phase II PROSPECT-C Trial. *Clin. Cancer Res.* **25**, 3830–3838, <https://doi.org/10.1158/1078-0432.CCR-18-3769>
- 63 Sur, D., Cainap, C., Burz, C., Havasi, A., Chis, I.C., Vlad, C. et al. (2019) The role of miRNA -31-3p and miR-31-5p in the anti-EGFR treatment efficacy of wild-type K-RAS metastatic colorectal cancer. Is it really the next best thing in miRNAs? *J. BUON*. **24**, 1739–1746
- 64 Li, Y. and Disney, M.D. (2018) Precise small molecule degradation of a noncoding RNA identifies cellular binding sites and modulates an oncogenic phenotype. *ACS Chem. Biol.* **13**, 3065–3071, <https://doi.org/10.1021/acschembio.8b00827>
- 65 Velagapudi, S.P., Cameron, M.D., Haga, C.L., Rosenberg, L.H., Lafitte, M., Duckett, D.R. et al. (2016) Design of a small molecule against an oncogenic noncoding RNA. *Proc. Natl. Acad. Sci. U.S.A.* **113**, 5898–5903, <https://doi.org/10.1073/pnas.1523975113>
- 66 Costales, M.G., Hoch, D.G., Abegg, D., Childs-Disney, J.L., Velagapudi, S.P., Adibekian, A. et al. (2019) A designed small molecule inhibitor of a non-coding RNA sensitizes HER2 negative cancers to herceptin. *J. Am. Chem. Soc.* **141**, 2960–2974, <https://doi.org/10.1021/jacs.8b10558>
- 67 Costales, M.G., Suresh, B., Vishnu, K. and Disney, M.D. (2019) Targeted degradation of a hypoxia-associated non-coding RNA enhances the selectivity of a small molecule interacting with RNA. *Cell Chem. Biol.* **26**, 1180.e5–1186.e5, <https://doi.org/10.1016/j.chembiol.2019.04.008>
- 68 Tahara, H., Kay, M.A., Yasui, W. and Tahara, E. (2013) MicroRNAs in Cancer: the 22nd Hiroshima Cancer Seminar/the 4th Japanese Association for RNA Interference Joint International Symposium, 30 August 2012, Grand Prince Hotel Hiroshima. *Jpn. J. Clin. Oncol.* **43**, 579–582, <https://doi.org/10.1093/jcco/hyt037>
- 69 Anastasiadou, E., Seto, A., Beatty, X., Hermreck, M., Gilles, M.E., Stroopinsky, D. et al. (2021) Cobomarsen, an oligonucleotide inhibitor of miR-155, slows DLBCL tumor cell growth *in vitro* and *in vivo*. *Clin. Cancer Res.* **27**, 1139–1149, <https://doi.org/10.1158/1078-0432.CCR-20-3139>
- 70 Shi, Z., Zhang, J., Qian, X., Han, L., Zhang, K., Chen, L. et al. (2013) AC1MMYR2, an inhibitor of dicer-mediated biogenesis of Oncomir miR-21, reverses epithelial-mesenchymal transition and suppresses tumor growth and progression. *Cancer Res.* **73**, 5519–5531, <https://doi.org/10.1158/0008-5472.CAN-13-0280>
- 71 Zhou, T., Kim, Y. and MacLeod, A.R. (2016) Targeting long noncoding RNA with antisense oligonucleotide technology as cancer therapeutics. *Methods Mol. Biol.* **1402**, 199–213, [https://doi.org/10.1007/978-1-4939-3378-5\\_16](https://doi.org/10.1007/978-1-4939-3378-5_16)
- 72 Amodio, N., Stamato, M.A., Juli, G., Morelli, E., Fulcinitti, M., Manzoni, M. et al. (2018) Drugging the lncRNA MALAT1 via LNA gapmeR ASO inhibits gene expression of proteasome subunits and triggers anti-multiple myeloma activity. *Leukemia* **32**, 1948–1957, <https://doi.org/10.1038/s41375-018-0067-3>
- 73 Li, X., Liang, T., Chen, S.S., Wang, M., Wang, R., Li, K. et al. (2020) Matrine suppression of self-renewal was dependent on regulation of LIN28A/Let-7 pathway in breast cancer stem cells. *J. Cell. Biochem.* **121**, 2139–2149, <https://doi.org/10.1002/jcb.29396>
- 74 Choi, S.K., Kim, H.S., Jin, T., Hwang, E.H., Jung, M. and Moon, W.K. (2016) Overexpression of the miR-141/200c cluster promotes the migratory and invasive ability of triple-negative breast cancer cells through the activation of the FAK and PI3K/AKT signaling pathways by secreting VEGF-A. *BMC Cancer* **16**, 570, <https://doi.org/10.1186/s12885-016-2620-7>
- 75 Wang, Q., Selth, L.A. and Callen, D.F. (2017) MiR-766 induces p53 accumulation and G2/M arrest by directly targeting MDM4. *Oncotarget* **8**, 29914–29924, <https://doi.org/10.18632/oncotarget.15530>
- 76 Ouzounova, M., Vuong, T., Ancy, P.B., Ferrand, M., Durand, G., Le-Calvez Kelm, F. et al. (2013) MicroRNA miR-30 family regulates non-attachment growth of breast cancer cells. *BMC Genomics* **14**, 139, <https://doi.org/10.1186/1471-2164-14-139>
- 77 Yu, B., You, W., Chen, G., Yu, Y. and Yang, Q. (2019) MiR-140-5p inhibits cell proliferation and metastasis by regulating MUC1 via BCL2A1/MAPK pathway in triple negative breast cancer. *Cell Cycle* **18**, 2641–2650, <https://doi.org/10.1080/15384101.2019.1653107>
- 78 Xia, C., Yang, Y., Kong, F., Kong, Q. and Shan, C. (2018) MiR-143-3p inhibits the proliferation, cell migration and invasion of human breast cancer cells by modulating the expression of MAPK7. *Biochimie* **147**, 98–104, <https://doi.org/10.1016/j.biochi.2018.01.003>
- 79 El Helou, R., Pinna, G., Cabaud, O., Wicinski, J., Bhajun, R., Guyon, L. et al. (2017) miR-600 acts as a bimodal switch that regulates breast cancer stem cell fate through WNT signaling. *Cell Rep.* **18**, 2256–2268, <https://doi.org/10.1016/j.celrep.2017.02.016>
- 80 Li, M., Pan, M., You, C., Zhao, F., Wu, D., Guo, M. et al. (2020) MiR-7 reduces the BCSC subset by inhibiting XIST to modulate the miR-92b/Slug/ESA axis and inhibit tumor growth. *Breast Cancer Res.* **22**, 26, <https://doi.org/10.1186/s13058-020-01264-z>
- 81 Zhang, X., Hu, Y., Gong, C. and Zhang, C. (2020) Overexpression of miR-518b in non-small cell lung cancer serves as a biomarker and facilitates tumor cell proliferation, migration and invasion. *Oncol. Lett.* **20**, 1213–1220, <https://doi.org/10.3892/ol.2020.11667>
- 82 Li, Y., Zhang, H., Fan, L., Mou, J., Yin, Y., Peng, C. et al. (2020) MiR-629-5p promotes the invasion of lung adenocarcinoma via increasing both tumor cell invasion and endothelial cell permeability. *Oncogene* **39**, 3473–3488, <https://doi.org/10.1038/s41388-020-1228-1>
- 83 Yang, G., Zhang, W., Yu, C., Ren, J. and An, Z. (2015) MicroRNA let-7: Regulation, single nucleotide polymorphism, and therapy in lung cancer. *J. Cancer Res. Ther.* **11**, C1–C6, <https://doi.org/10.4103/0973-1482.163830>
- 84 Liu, C., Hu, W., Li, L.L., Wang, Y.X., Zhou, Q., Zhang, F. et al. (2018) Roles of miR-200 family members in lung cancer: more than tumor suppressors. *Future Oncol.* **14**, 2875–2886, <https://doi.org/10.2217/fon-2018-0155>
- 85 Hong, H., Yao, S., Zhang, Y., Ye, Y., Li, C., Hu, L. et al. (2020) In vivo miRNA knockout screening identifies miR-190b as a novel tumor suppressor. *PLoS Genet.* **16**, e1009168, <https://doi.org/10.1371/journal.pgen.1009168>
- 86 Kobayashi, M., Salomon, C., Tapia, J., Illanes, S.E., Mitchell, M.D. and Rice, G.E. (2014) Ovarian cancer cell invasiveness is associated with discordant exosomal sequestration of Let-7 miRNA and miR-200. *J. Transl. Med.* **12**, 4, <https://doi.org/10.1186/1479-5876-12-4>

- 87 Zhu, H., Yang, S.Y., Wang, J., Wang, L. and Han, S.Y. (2016) Evidence for miR-17-92 and miR-134 gene cluster regulation of ovarian cancer drug resistance. *Eur. Rev. Med. Pharmacol. Sci.* **20**, 2526–2531
- 88 Xiang, G. and Cheng, Y. (2018) MiR-126-3p inhibits ovarian cancer proliferation and invasion via targeting PLXNB2. *Reprod. Biol.* **18**, 218–224, <https://doi.org/10.1016/j.repbio.2018.07.005>
- 89 Li, J.Z., Li, J., Wang, H.Q., Li, X., Wen, B. and Wang, Y.J. (2017) MiR-141-3p promotes prostate cancer cell proliferation through inhibiting kruppel-like factor-9 expression. *Biochem. Biophys. Res. Commun.* **482**, 1381–1386, <https://doi.org/10.1016/j.bbrc.2016.12.045>
- 90 Ozen, M., Karatas, O.F., Gulluoglu, S., Bayrak, O.F., Sevil, S., Guzel, E. et al. (2015) Overexpression of miR-145-5p inhibits proliferation of prostate cancer cells and reduces SOX2 expression. *Cancer Invest.* **33**, 251–258, <https://doi.org/10.3109/07357907.2015.1025407>
- 91 Cheng, C.Y., Hwang, C.I., Corney, D.C., Flesken-Nikitin, A., Jiang, L., Oner, G.M. et al. (2014) miR-34 cooperates with p53 in suppression of prostate cancer by joint regulation of stem cell compartment. *Cell Rep.* **6**, 1000–1007, <https://doi.org/10.1016/j.celrep.2014.02.023>
- 92 Ren, B., Yang, B., Li, P. and Ge, L. (2020) Upregulation of MiR-1274a is correlated with survival outcomes and promotes cell proliferation, migration, and invasion of colon cancer. *Onco Targets Ther.* **13**, 6957–6966, <https://doi.org/10.2147/OTT.S246160>
- 93 Fu, Q., Du, Y., Yang, C., Zhang, D., Zhang, N., Liu, X. et al. (2016) An oncogenic role of miR-592 in tumorigenesis of human colorectal cancer by targeting Forkhead Box O3A (FoxO3A). *Expert Opin. Ther. Targets* **20**, 771–782, <https://doi.org/10.1080/14728222.2016.1181753>
- 94 Ding, X., Zhang, J., Feng, Z., Tang, Q. and Zhou, X. (2020) MiR-137-3p inhibits colorectal cancer cell migration by regulating a KDM1A-dependent epithelial-mesenchymal transition. *Dig. Dis. Sci.*, <https://doi.org/10.1007/s10620-020-06518-6>
- 95 Cong, J., Gong, J., Yang, C., Xia, Z. and Zhang, H. (2020) miR-22 suppresses tumor invasion and metastasis in colorectal cancer by targeting NLRP3. *Cancer Manag. Res.* **12**, 5419–5429, <https://doi.org/10.2147/CMAR.S255125>
- 96 Chang, S., Sun, G., Zhang, D., Li, Q. and Qian, H. (2020) MiR-3622a-3p acts as a tumor suppressor in colorectal cancer by reducing stemness features and EMT through targeting spalt-like transcription factor 4. *Cell Death Dis.* **11**, 592, <https://doi.org/10.1038/s41419-020-02789-z>
- 97 Wang, Y., Chen, R., Zhou, X., Guo, R., Yin, J., Li, Y. et al. (2020) miR-137: A Novel Therapeutic Target for Human Glioma. *Mol. Ther. Nucleic Acids* **21**, 614–622, <https://doi.org/10.1016/j.omtn.2020.06.028>
- 98 Huo, L., Wang, B., Zheng, M., Zhang, Y., Xu, J., Yang, G. et al. (2019) miR-128-3p inhibits glioma cell proliferation and differentiation by targeting NPTX1 through IRS-1/PI3K/AKT signaling pathway. *Exp. Ther. Med.* **17**, 2921–2930, <https://doi.org/10.3892/etm.2019.7284>
- 99 Yang, Y., Wu, J., Guan, H., Cai, J., Fang, L., Li, J. et al. (2012) MiR-136 promotes apoptosis of glioma cells by targeting AEG-1 and Bcl-2. *FEBS Lett.* **586**, 3608–3612, <https://doi.org/10.1016/j.febslet.2012.08.003>
- 100 Nwaeburu, C.C., Abukwian, A., Zhao, Z. and Herr, I. (2017) Quercetin-induced miR-200b-3p regulates the mode of self-renewing divisions in pancreatic cancer. *Mol. Cancer* **16**, 23, <https://doi.org/10.1186/s12943-017-0589-8>
- 101 Yao, R., Xu, L., Wei, B., Qian, Z., Wang, J., Hui, H. et al. (2019) miR-142-5p regulates pancreatic cancer cell proliferation and apoptosis by regulation of RAP1A. *Pathol. Res. Pract.* **215**, 152416, <https://doi.org/10.1016/j.prp.2019.04.008>
- 102 Choi, J.Y., Shin, H.J. and Bae, I.H. (2018) miR-93-5p suppresses cellular senescence by directly targeting Bcl-w and p21. *Biochem. Biophys. Res. Commun.* **505**, 1134–1140, <https://doi.org/10.1016/j.bbrc.2018.10.010>
- 103 Gao, Y., Zhang, S.G., Wang, Z.H. and Liao, J.C. (2017) Down-regulation of miR-342-3p in hepatocellular carcinoma tissues and its prognostic significance. *Eur. Rev. Med. Pharmacol. Sci.* **21**, 2098–2102
- 104 Liu, L., Zhang, W., Hu, Y., Ma, L. and Xu, X. (2020) Downregulation of miR-1225-5p is pivotal for proliferation, invasion, and migration of HCC cells through NF-κB regulation. *J. Clin. Lab. Anal.* **34**, e23474, <https://doi.org/10.1002/jcla.23474>
- 105 Zhang, X., Jiang, P., Shuai, L., Chen, K., Li, Z., Zhang, Y. et al. (2016) miR-589-5p inhibits MAP3K8 and suppresses CD90(+) cancer stem cells in hepatocellular carcinoma. *J. Exp. Clin. Cancer Res.* **35**, 176, <https://doi.org/10.1186/s13046-016-0452-6>
- 106 Cao, F.Y., Zheng, Y.B., Yang, C., Huang, S.Y., He, X.B. and Tong, S.L. (2020) miR-635 targets KIF1C to inhibit the progression of gastric cancer. *J. Invest. Med.* **68**, 1357–1363, <https://doi.org/10.1136/jim-2020-001438>
- 107 Zhao, H., Zheng, Y., You, J., Xiong, J., Ying, S., Xie, L. et al. (2020) Tumor suppressor role of miR-876-5p in gastric cancer. *Oncol. Lett.* **20**, 1281–1287, <https://doi.org/10.3892/ol.2020.11680>
- 108 Lovat, F., Nigita, G., Distefano, R., Nakamura, T., Gasparini, P., Tomasello, L. et al. (2020) Combined loss of function of two different loci of miR-15/16 drives the pathogenesis of acute myeloid leukemia. *Proc. Natl. Acad. Sci. U.S.A.* **117**, 12332–12340, <https://doi.org/10.1073/pnas.2003597117>
- 109 Khalaj, M., Woolthuis, C.M., Hu, W., Durham, B.H., Chu, S.H., Qamar, S. et al. (2017) miR-99 regulates normal and malignant hematopoietic stem cell self-renewal. *J. Exp. Med.* **214**, 2453–2470, <https://doi.org/10.1084/jem.20161595>
- 110 Lin, H., Rothe, K., Chen, M., Wu, A., Babaian, A., Yen, R. et al. (2020) The miR-185/PAK6 axis predicts therapy response and regulates survival of drug-resistant leukemic stem cells in CML. *Blood* **136**, 596–609, <https://doi.org/10.1182/blood.2019003636>
- 111 Su, Y.L., Wang, X., Mann, M., Adamus, T.P., Wang, D., Moreira, D.F. et al. (2020) Myeloid cell-targeted miR-146a mimic inhibits NF-κB-driven inflammation and leukemia progression in vivo. *Blood* **135**, 167–180, <https://doi.org/10.1182/blood.2019002045>
- 112 Li, Z., Jin, C., Chen, S., Zheng, Y., Huang, Y., Jia, L. et al. (2017) Long non-coding RNA MEG3 inhibits adipogenesis and promotes osteogenesis of human adipose-derived mesenchymal stem cells via miR-140-5p. *Mol. Cell. Biochem.*, <https://doi.org/10.1007/s11010-017-3015-z>
- 113 Zong, Y., Zhang, Y., Hou, D., Xu, J., Cui, F., Qin, Y. et al. (2020) The lncRNA XIST promotes the progression of breast cancer by sponging miR-125b-5p to modulate NLRP5. *Am. J. Transl. Res.* **12**, 3501–3511
- 114 Shima, H., Kida, K., Adachi, S., Yamada, A., Sugae, S., Narui, K. et al. (2018) Lnc RNA H19 is associated with poor prognosis in breast cancer patients and promotes cancer stemness. *Breast Cancer Res. Treat.* **170**, 507–516, <https://doi.org/10.1007/s10549-018-4793-z>
- 115 Zhou, Q., Guo, J., Huang, W., Yu, X., Xu, C. and Long, X. (2020) Linc-ROR promotes the progression of breast cancer and decreases the sensitivity to rapamycin through miR-194-3p targeting MECP2. *Mol. Oncol.* **14**, 2231–2250, <https://doi.org/10.1002/1878-0261.12700>
- 116 Wang, Y., Gong, G., Xu, J., Zhang, Y., Wu, S. and Wang, S. (2020) Long noncoding RNA HOTAIR promotes breast cancer development by targeting ZEB1 via sponging miR-601. *Cancer Cell Int.* **20**, 320, <https://doi.org/10.1186/s12935-020-01410-9>

- 117 Chang, K.C., Diermeier, S.D., Yu, A.T., Brine, L.D., Russo, S., Bhatia, S. et al. (2020) MaTAR25 lncRNA regulates the Tensin1 gene to impact breast cancer progression. *Nat. Commun.* **11**, 6438, <https://doi.org/10.1038/s41467-020-20207-y>
- 118 Shi, Q., Li, Y., Li, S., Jin, L., Lai, H., Wu, Y. et al. (2020) LncRNA DILA1 inhibits Cyclin D1 degradation and contributes to tamoxifen resistance in breast cancer. *Nat. Commun.* **11**, 5513, <https://doi.org/10.1038/s41467-020-19349-w>
- 119 Fang, Z., Wang, Y., Wang, Z., Xu, M., Ren, S., Yang, D. et al. (2020) ERINA is an estrogen-responsive lncRNA that drives breast cancer through the E2F1/RB1 pathway. *Cancer Res.* **80**, 4399–4413, <https://doi.org/10.1158/0008-5472.CAN-20-1031>
- 120 Jin, X., Xu, X.E., Jiang, Y.Z., Liu, Y.R., Sun, W., Guo, Y.J. et al. (2019) The endogenous retrovirus-derived long noncoding RNA TROJAN promotes triple-negative breast cancer progression via ZMYND8 degradation. *Sci. Adv.* **5**, eaat9820, <https://doi.org/10.1126/sciadv.aat9820>
- 121 Zagorac, S., de Giorgio, A., Dabrowska, A., Kalisz, M., Casas-Vila, N., Cathcart, P. et al. (2020) SCIRT lncRNA restrains tumorigenesis by opposing transcriptional programs of tumor-initiating cells. *Cancer Res.* **81**, 580–593, <https://doi.org/10.1158/0008-5472.CAN-20-2612>
- 122 Cho, S.W., Xu, J., Sun, R., Mumbach, M.R., Carter, A.C., Chen, Y.G. et al. (2018) Promoter of lncRNA gene PVT1 is a tumor-suppressor DNA boundary element. *Cell* **173**, 1398.e22–1412.e22, <https://doi.org/10.1016/j.cell.2018.03.068>
- 123 Zhang, Y., Guo, J., Cai, E., Cai, J., Wen, Y., Lu, S. et al. (2020) HOTAIR maintains the stemness of ovarian cancer stem cells via the miR-206/TBX3 axis. *Exp. Cell. Res.* **395**, 112218, <https://doi.org/10.1016/j.yexcr.2020.112218>
- 124 Li, Y., Hou, C.Z., Dong, Y.L., Zhu, L. and Xu, H. (2020) Long noncoding RNA LINP1 promoted proliferation and invasion of ovarian cancer via inhibiting KLF6. *Eur. Rev. Med. Pharmacol. Sci.* **24**, 7918
- 125 Wang, J., Gu, J., You, A., Li, J., Zhang, Y., Rao, G. et al. (2020) The transcription factor USF1 promotes glioma cell invasion and migration by activating lncRNA HAS2-AS1. *Biosci. Rep.* **40**, <https://doi.org/10.1042/BSR20200487>
- 126 Liu, Z.Z., Tian, Y.F., Wu, H., Ouyang, S.Y. and Kuang, W.L. (2020) LncRNA H19 promotes glioma angiogenesis through miR-138/HIF-1 $\alpha$ /VEGF axis. *Neoplasma* **67**, 111–118, <https://doi.org/10.4149/neo.2019.190121N61>
- 127 Li, D.X., Fei, X.R., Dong, Y.F., Cheng, C.D., Yang, Y., Deng, X.F. et al. (2017) The long non-coding RNA CRNDE acts as a ceRNA and promotes glioma malignancy by preventing miR-136-5p-mediated downregulation of Bcl-2 and Wnt2. *Oncotarget* **8**, 88163–88178, <https://doi.org/10.18632/oncotarget.21513>
- 128 Shen, J., Xiong, J., Shao, X., Cheng, H., Fang, X., Sun, Y. et al. (2020) Knockdown of the long noncoding RNA XIST suppresses glioma progression by upregulating miR-204-5p. *J. Cancer* **11**, 4550–4559, <https://doi.org/10.7150/jca.45676>
- 129 Feng, S., Yao, J., Chen, Y., Geng, P., Zhang, H., Ma, X. et al. (2015) Expression and functional role of reprogramming-related long noncoding RNA (lncRNA-ROR) in glioma. *J. Mol. Neurosci.* **56**, 623–630, <https://doi.org/10.1007/s12031-014-0488-z>
- 130 Gong, X. and Zhu, Z. (2020) Long noncoding RNA HOTAIR contributes to progression in hepatocellular carcinoma by sponging miR-217-5p. *Cancer Biother. Radiopharm.* **35**, 387–396, <https://doi.org/10.1089/cbr.2019.3070>
- 131 Zhu, P., Wang, Y., Huang, G., Ye, B., Liu, B., Wu, J. et al. (2016) lnc-beta-Catm elicits EZH2-dependent beta-catenin stabilization and sustains liver CSC self-renewal. *Nat. Struct. Mol. Biol.* **23**, 631–639, <https://doi.org/10.1038/nsmb.3235>
- 132 Sun, X., Qian, Y., Wang, X., Cao, R., Zhang, J., Chen, W. et al. (2020) LncRNA TRG-AS1 stimulates hepatocellular carcinoma progression by sponging miR-4500 to modulate BACH1. *Cancer Cell Int.* **20**, 367, <https://doi.org/10.1186/s12935-020-01440-3>
- 133 Liu, N., Liu, Q., Yang, X., Zhang, F., Li, X., Ma, Y. et al. (2018) Hepatitis B virus-upregulated LNC-HUR1 promotes cell proliferation and tumorigenesis by blocking p53 activity. *Hepatology* **68**, 2130–2144, <https://doi.org/10.1002/hep.30098>
- 134 Li, Z., Zhang, J., Liu, X., Li, S., Wang, Q., Di, C. et al. (2018) The LINC01138 drives malignancies via activating arginine methyltransferase 5 in hepatocellular carcinoma. *Nat. Commun.* **9**, 1572, <https://doi.org/10.1038/s41467-018-04006-0>
- 135 Malakar, P., Shilo, A., Mogilevsky, A., Stein, I., Pikarsky, E., Nevo, Y. et al. (2017) Long noncoding RNA MALAT1 promotes hepatocellular carcinoma development by SRSF1 upregulation and mTOR activation. *Cancer Res.* **77**, 1155–1167, <https://doi.org/10.1158/0008-5472.CAN-16-1508>
- 136 Wang, X., Sun, W., Shen, W., Xia, M., Chen, C., Xiang, D. et al. (2016) Long non-coding RNA DILC regulates liver cancer stem cells via IL-6/STAT3 axis. *J. Hepatol.* **64**, 1283–1294, <https://doi.org/10.1016/j.jhep.2016.01.019>
- 137 Qian, Y.Y., Li, K., Liu, Q.Y. and Liu, Z.S. (2017) Long non-coding RNA PTENP1 interacts with miR-193a-3p to suppress cell migration and invasion through the PTEN pathway in hepatocellular carcinoma. *Oncotarget* **8**, 107859–107869, <https://doi.org/10.18632/oncotarget.22305>
- 138 Xu, F., Li, C.H., Wong, C.H., Chen, G.G., Lai, P.B.S., Shao, S. et al. (2019) Genome-Wide screening and functional analysis identifies tumor suppressor long noncoding RNAs epigenetically silenced in hepatocellular carcinoma. *Cancer Res.* **79**, 1305–1317, <https://doi.org/10.1158/0008-5472.CAN-18-1659>
- 139 Gu, Z.G., Shen, G.H., Lang, J.H., Huang, W.X., Qian, Z.H. and Qiu, J. (2020) Effects of long non-coding RNA URHC on proliferation, apoptosis and invasion of colorectal cancer cells. *Eur. Rev. Med. Pharmacol. Sci.* **24**, 7910
- 140 Chen, B., Dragomir, M.P., Fabris, L., Bayraktar, R., Knutsen, E., Liu, X. et al. (2020) The long noncoding RNA CCAT2 induces chromosomal instability through BOP1-AURKB signaling. *Gastroenterology* **159**, 2146.e33–2162.e33, <https://doi.org/10.1053/j.gastro.2020.08.018>
- 141 Li, X.L., Subramanian, M., Jones, M.F., Chaudhary, R., Singh, D.K., Zong, X. et al. (2017) Long noncoding RNA PURPL suppresses basal p53 levels and promotes tumorigenicity in colorectal cancer. *Cell Rep.* **20**, 2408–2423, <https://doi.org/10.1016/j.celrep.2017.08.041>
- 142 Zhou, B., Yi, F., Chen, Y., Li, C.H., Cheng, Y.S. and Yang, K. (2020) Reduced long noncoding RNA PGM5-AS1 facilitated proliferation and invasion of colorectal cancer through sponging miR-100-5p. *Eur. Rev. Med. Pharmacol. Sci.* **24**, 7972–7981
- 143 Sun, Z.Q., Chen, C., Zhou, Q.B., Liu, J.B., Yang, S.X., Li, Z. et al. (2017) Long non-coding RNA LINC00959 predicts colorectal cancer patient prognosis and inhibits tumor progression. *Oncotarget* **8**, 97052–97060, <https://doi.org/10.18632/oncotarget.21171>
- 144 Su, W., Feng, S., Chen, X., Yang, X., Mao, R., Guo, C. et al. (2018) Silencing of long noncoding RNA MIR22HG triggers cell survival/death signaling via oncogenes YBX1, MET, and p21 in lung cancer. *Cancer Res.* **78**, 3207–3219, <https://doi.org/10.1158/0008-5472.CAN-18-0222>
- 145 Hu, W.L., Jin, L., Xu, A., Wang, Y.F., Thorne, R.F., Zhang, X.D. et al. (2018) GUARDIN is a p53-responsive long non-coding RNA that is essential for genomic stability. *Nat. Cell Biol.* **20**, 492–502, <https://doi.org/10.1038/s41556-018-0066-7>

- 146 Shahabi, S., Kumaran, V., Castillo, J., Cong, Z., Nandagopal, G., Mullen, D.J. et al. (2019) LINC00261 is an epigenetically regulated tumor suppressor essential for activation of the DNA damage response. *Cancer Res.* **79**, 3050–3062, <https://doi.org/10.1158/0008-5472.CAN-18-2034>
- 147 David, A., Zocchi, S., Talbot, A., Choisy, C., Ohnona, A., Lion, J. et al. (2020) The long non-coding RNA CRNDE regulates growth of multiple myeloma cells via an effect on IL6 signalling. *Leukemia*, <https://doi.org/10.1038/s41375-020-01034-y>
- 148 Wang, Y., Zhang, M., Xu, H., Wang, Y., Li, Z., Chang, Y. et al. (2017) Discovery and validation of the tumor-suppressive function of long noncoding RNA PANDA in human diffuse large B-cell lymphoma through the inactivation of MAPK/ERK signaling pathway. *Oncotarget* **8**, 72182–72196, <https://doi.org/10.18632/oncotarget.20053>
- 149 Wang, Y., Li, J., Du, C., Zhang, L., Zhang, Y., Zhang, J. et al. (2019) Upregulated circular RNA circ-UBE2D2 predicts poor prognosis and promotes breast cancer progression by sponging miR-1236 and miR-1287. *Transl. Oncol.* **12**, 1305–1313, <https://doi.org/10.1016/j.tranon.2019.05.016>
- 150 Ye, G., Pan, R., Zhu, L. and Zhou, D. (2020) Circ.DCAF6 potentiates cell stemness and growth in breast cancer through GLI1-Hedgehog pathway. *Exp. Mol. Pathol.* **116**, 104492, <https://doi.org/10.1016/j.yexmp.2020.104492>
- 151 Du, W.W., Yang, W., Li, X., Awan, F.M., Yang, Z., Fang, L. et al. (2018) A circular RNA circ-DNMT1 enhances breast cancer progression by activating autophagy. *Oncogene* **37**, 5829–5842, <https://doi.org/10.1038/s41388-018-0369-y>
- 152 Mao, Y., Lv, M., Cao, W., Liu, X., Cui, J., Wang, Y. et al. (2020) Circular RNA 000554 represses epithelial-mesenchymal transition in breast cancer by regulating microRNA-182/ZFP36 axis. *FASEB J.* **34**, 11405–11420, <https://doi.org/10.1096/fj.201903047R>
- 153 Hu, Y., Guo, F., Zhu, H., Tan, X., Zhu, X., Liu, X. et al. (2020) Circular RNA-0001283 suppresses breast cancer proliferation and invasion via MiR-187/HIPK3 axis. *Med. Sci. Monit.* **26**, e921502, <https://doi.org/10.12659/MSM.921502>
- 154 Xiong, S., Li, D., Wang, D., Huang, L., Liang, G., Wu, Z. et al. (2020) Circular RNA MYLK promotes glycolysis and proliferation of non-small cell lung cancer cells by sponging miR-195-5p and increasing glucose transporter member 3 expression. *Cancer Manag. Res.* **12**, 5469–5478, <https://doi.org/10.2147/CMAR.S257386>
- 155 Fu, Y., Su, L., Cai, M., Yao, B., Xiao, S., He, Q. et al. (2019) Downregulation of CPA4 inhibits non small-cell lung cancer growth by suppressing the AKT/c-MYC pathway. *Mol. Carcinog.* **58**, 2026–2039, <https://doi.org/10.1002/mc.23095>
- 156 Xue, M., Hong, W., Jiang, J., Zhao, F. and Gao, X. (2020) Circular RNA circ-LDLRAD3 serves as an oncogene to promote non-small cell lung cancer progression by upregulating SLC1A5 through sponging miR-137. *RNA Biol.* **17**, 1811–1822, <https://doi.org/10.1080/15476286.2020.1789819>
- 157 Dai, J., Zhuang, Y., Tang, M., Qian, Q. and Chen, J.P. (2020) CircRNA UBAP2 facilitates the progression of colorectal cancer by regulating miR-199a/VEGFA pathway. *Eur. Rev. Med. Pharmacol. Sci.* **24**, 7963–7971
- 158 Yang, Y., Zhang, Y., Chen, B., Ding, L., Mu, Z. and Li, Y. (2019) Elevation of circular RNA circ-POSTN facilitates cell growth and invasion by sponging miR-1205 in glioma. *J. Cell. Biochem.* **120**, 16567–16574, <https://doi.org/10.1002/jcb.28916>
- 159 Zhang, M., Huang, N., Yang, X., Luo, J., Yan, S., Xiao, F. et al. (2018) A novel protein encoded by the circular form of the SHPRH gene suppresses glioma tumorigenesis. *Oncogene* **37**, 1805–1814, <https://doi.org/10.1038/s41388-017-0019-9>
- 160 Zang, H., Li, Y., Zhang, X. and Huang, G. (2020) Circ.0000517 contributes to hepatocellular carcinoma progression by upregulating TXNDC5 via sponging miR-1296-5p. *Cancer Manag. Res.* **12**, 3457–3468, <https://doi.org/10.2147/CMAR.S244024>
- 161 Zhu, Q., Lu, G., Luo, Z., Gui, F., Wu, J., Zhang, D. et al. (2018) CircRNA circ-0067934 promotes tumor growth and metastasis in hepatocellular carcinoma through regulation of miR-1324/FZD5/Wnt/beta-catenin axis. *Biochem. Biophys. Res. Commun.* **497**, 626–632, <https://doi.org/10.1016/j.bbrc.2018.02.119>
- 162 Hu, Z.Q., Zhou, S.L., Li, J., Zhou, Z.J., Wang, P.C., Xin, H.Y. et al. (2020) Circular RNA sequencing identifies CircASAP1 as a key regulator in hepatocellular carcinoma metastasis. *Hepatology* **72**, 906–922, <https://doi.org/10.1002/hep.31068>
- 163 Wei, Y., Chen, X., Liang, C., Ling, Y., Yang, X., Ye, X. et al. (2020) A noncoding regulatory RNAs network driven by Circ-CDYL acts specifically in the early stages hepatocellular carcinoma. *Hepatology* **71**, 130–147, <https://doi.org/10.1002/hep.30795>
- 164 Meng, J., Chen, S., Han, J.X., Qian, B., Wang, X.R., Zhong, W.L. et al. (2018) Twist1 regulates vimentin through Cui2 circular RNA to promote EMT in hepatocellular carcinoma. *Cancer Res.* **78**, 4150–4162, <https://doi.org/10.1158/0008-5472.CAN-17-3009>
- 165 Mi, L., Lei, L., Yin, X., Li, N., Shi, J., Han, X. et al. (2020) Circ\_0000144 functions as a miR-623 sponge to enhance gastric cancer progression via up-regulating GPRC5A. *Biosci. Rep.* **40**, <https://doi.org/10.1042/BSR20201313>
- 166 Liu, Y., Jiang, Y., Xu, L., Qu, C., Zhang, L., Xiao, X. et al. (2020) circ-NRIP1 promotes glycolysis and tumor progression by regulating miR-186-5p/MYH9 axis in gastric cancer. *Cancer Manag. Res.* **12**, 5945–5956, <https://doi.org/10.2147/CMAR.S245941>
- 167 Zhou, J., Dong, Z.N., Qiu, B.Q., Hu, M., Liang, X.Q., Dai, X. et al. (2020) CircRNA FGFR3 induces epithelial-mesenchymal transition of ovarian cancer by regulating miR-29a-3p/E2F1 axis. *Aging (Albany N.Y.)* **12**, 14080–14091, <https://doi.org/10.18632/aging.103388>
- 168 Xu, Q., Deng, B., Li, M., Chen, Y. and Zhuan, L. (2020) circRNA-UBAP2 promotes the proliferation and inhibits apoptosis of ovarian cancer though miR-382-5p/PRPF8 axis. *J. Ovarian Res.* **13**, 81, <https://doi.org/10.1186/s13048-020-00685-w>
- 169 Gong, J., Xu, X., Zhang, X. and Zhou, Y. (2020) Circular RNA-9119 suppresses in ovarian cancer cell viability via targeting the microRNA-21-5p-PTEN-Akt pathway. *Aging (Albany N.Y.)* **12**, 14314–14328, <https://doi.org/10.18632/aging.103470>
- 170 Lin, C., Xu, X., Yang, Q., Liang, L. and Qiao, S. (2020) Circular RNA ITCH suppresses proliferation, invasion, and glycolysis of ovarian cancer cells by up-regulating CDH1 via sponging miR-106a. *Cancer Cell Int.* **20**, 336, <https://doi.org/10.1186/s12935-020-01420-7>
- 171 Wang, N., Cao, Q.X., Tian, J., Ren, L., Cheng, H.L. and Yang, S.Q. (2020) Circular RNA MTO1 inhibits the proliferation and invasion of ovarian cancer cells through the miR-182-5p/KLF15 axis. *Cell Transplant.* **29**, 963689720943613, <https://doi.org/10.1177/0963689720943613>
